# Supplementary material for: High-throughput fitness screening and transcriptomics identify a role for a type IV secretion system in the pathogenesis of Crohn’s disease-associated Escherichia coli
Source: PubMed Central journal article supplement (PMC8016931; doi:10.1038/s41467-021-22306-w), 2021-04-01
Supplement: 41467_2021_22306_MOESM1_ESM.pdf [file 41467_2021_22306_MOESM1_ESM.pdf]

## Supplementary Information

**a**

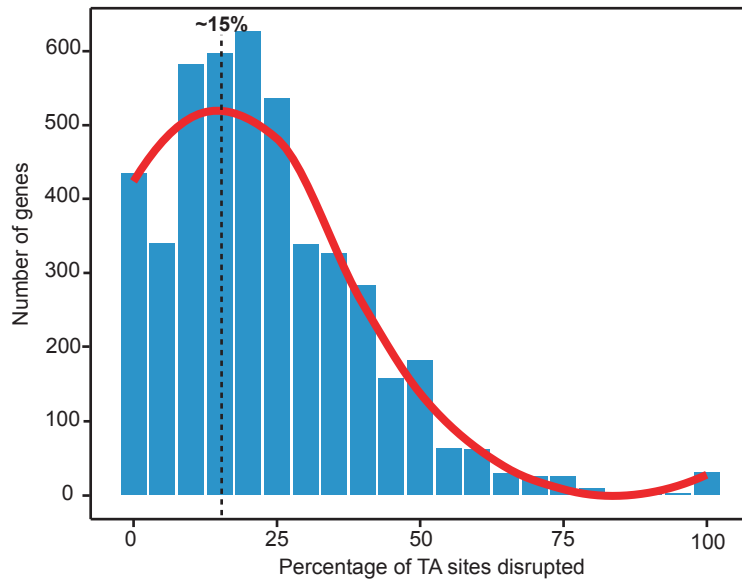

**b**

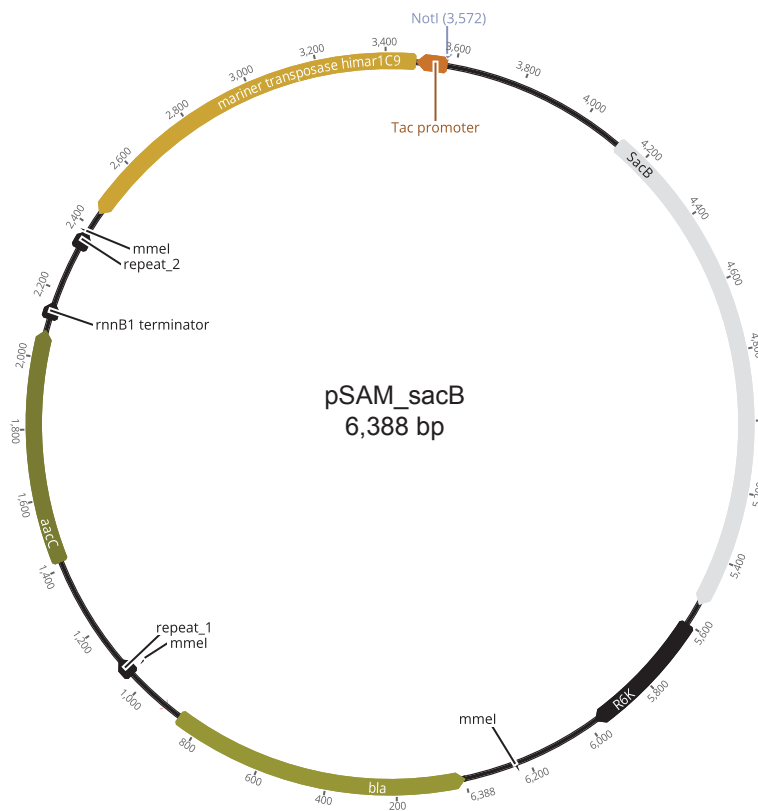

**Supplementary Figure 1. Modifying the transposon mutagenesis system to increase AIEC library saturation.** **a.** Histogram showing the percentage of “TA” sites disrupted per gene in AIEC strain NRG857c using the original transposon system. Shown is  $n = 1$  of 3 technical replicates of the AIEC transposon mutant library that showed similar distribution. **b.** Map illustration of plasmid pSAM\_SacB.

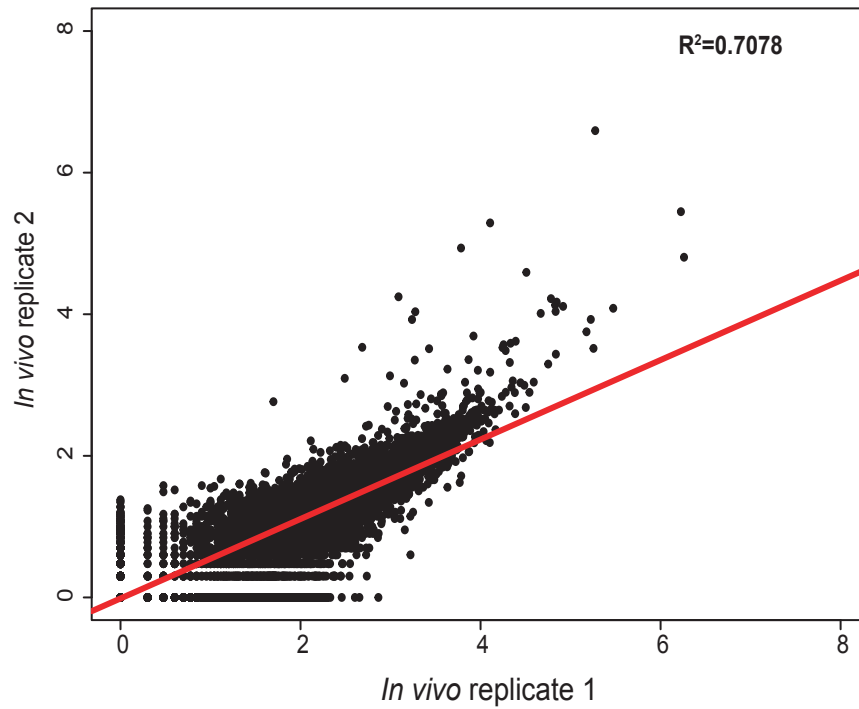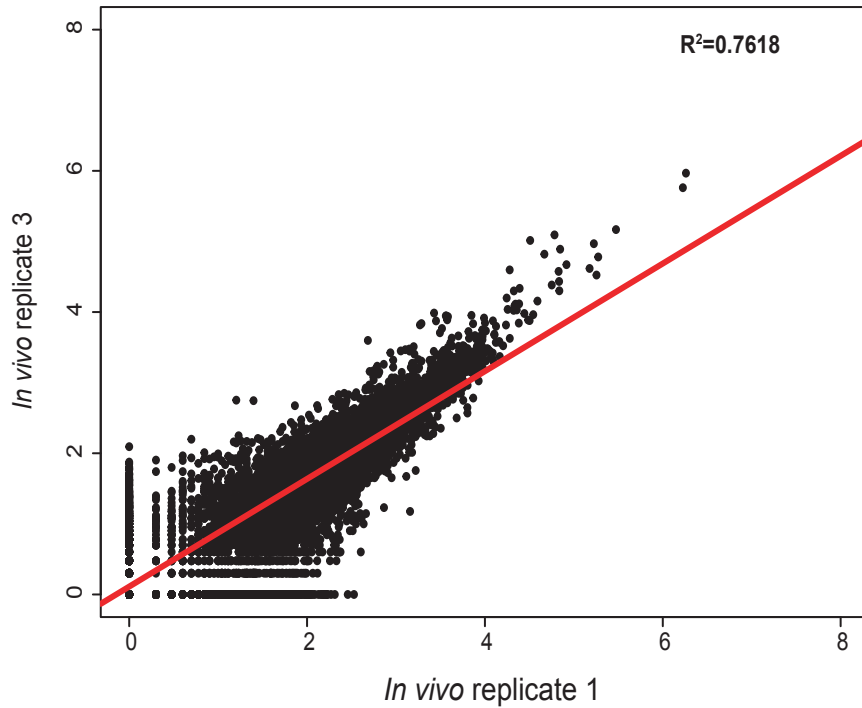

**Supplementary Figure 2. Correlation plots between different *in vivo* mutant libraries.**

Each point represents the  $\log_{10}$  value of the number of mapped reads of one mutant in each of two libraries. The correlation coefficient ( $R^2$ ) on log-transformed abundance values is shown.

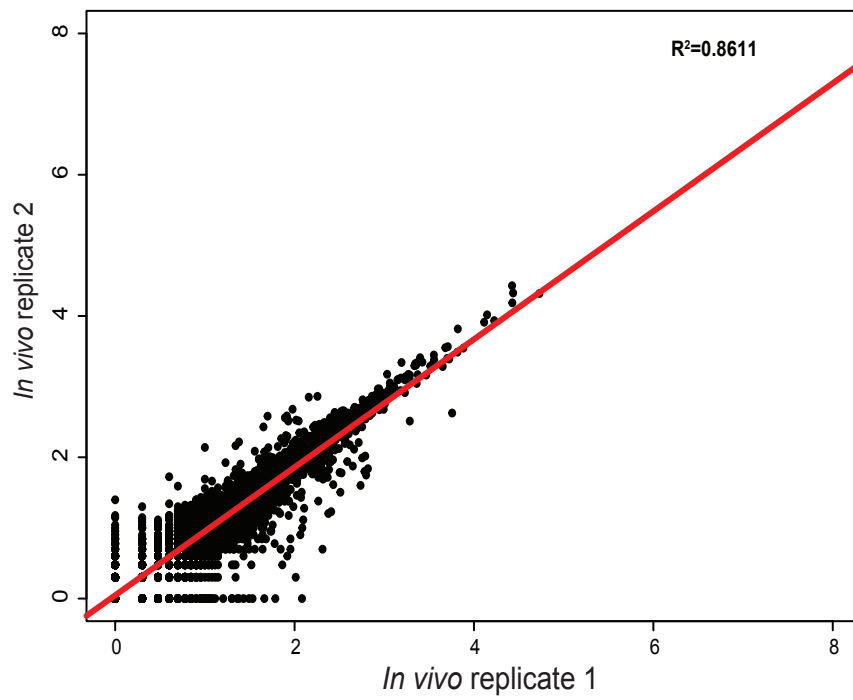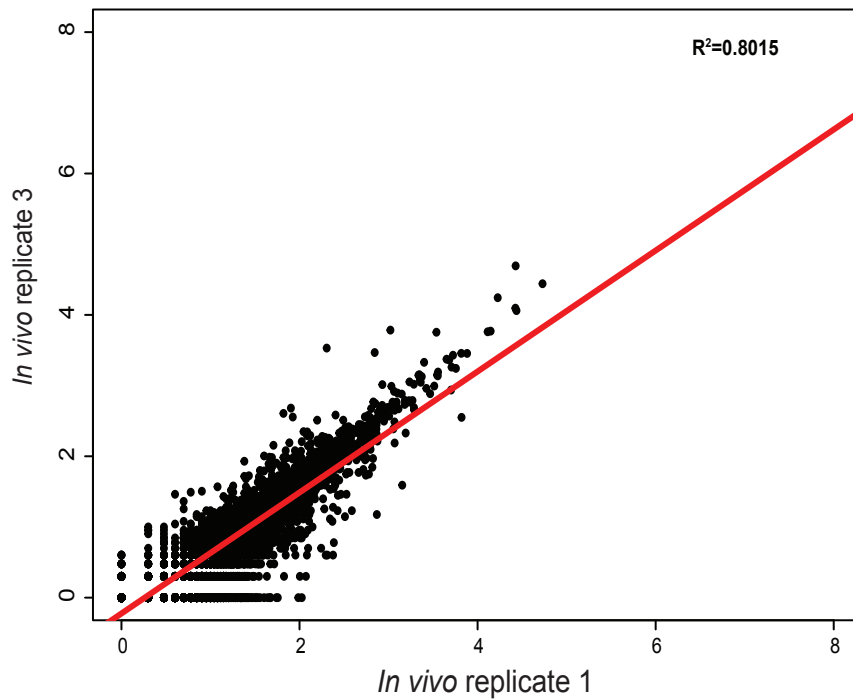

**Supplementary Figure 3. Correlation plots between different *in vivo* transcriptomes.** Each point represents the  $\log_{10}$  value of the number of mapped reads per gene in each of the two libraries. The correlation coefficient ( $R^2$ ) on log-transformed abundance values is shown.
